# Supplementary material for: PRL/microRNA-183/IRS1 Pathway Regulates Milk Fat Metabolism in Cow Mammary Epithelial Cells
Source: PubMed Central journal article supplement (PMC7073568; doi:10.3390/genes11020196), 2020-02-13
Supplement: genes-11-00196-s001.pdf [file genes-11-00196-s001.pdf]

**Table S1: Bta-mir-183 sequence**

| miRNA primer name         | Primer sequences        |
|---------------------------|-------------------------|
| >bta-miR-183 MIMAT0003813 | UAUGGCACUGGUAGAAUUCACUG |

**Table S2: Primer sequence of gene**

| *Primer sequences(5'--3') | *The primer name |
|---------------------------|------------------|
| F: GGAGCTTATCCAGGCCAATG   | F:ATGL           |
| R: TGCGGGCAGATGTCCTCT     | R:ATGL           |
| F: GTACAGATGCAGCCTCATTTC  | F: CD36          |
| R: TGGACCTGCAAATATCAGAGGA | R:CD36           |
| F: CCAGCTGACAGCTCCATTGA   | F: SREBP1        |
| R: TGC GCGCCACAAGGA       | R:SREBP1         |
| F: AGGACACTTGCCACCTCATTC  | F: ABCG1         |
| R: TTGGAGTCTGGTTCCTCTTGTA | R: ABCG1         |
| F: CCATCGCCTGTGGAGTCAC    | F: SCD           |
| R: GTCGGATAAATCTAGCGTAGCA | R:SCD            |
| F: AAGGACCTCTACGCCAACACG  | F: CPT1          |
| R: TTTGCGGTGGACGATGGAG    | R:CPT1           |
| F: CAGCTGGCCAAATACCTTCAA  | F:UXT            |
| R: CAGCTGGCCAAATACCTTCAA  | R:UXT            |
| F: CTCCAACCTCAACCACTACGG  | F: ABCA1         |
| R: GGGGAATCACAGAAGCAGCC   | R:ABCA1          |
| F: GGGCTCACCACCGTGTTC     | F:FASN           |
| R:GCTCTGCTGGGCCTGCAGCTG   | R:FASN           |
| F: GGGAGCACTACAAACGCAACG  | F:HSL            |
| R:TGAATGATCCGCTCAAACCTCG  | R:HSL            |
| F: TCAGTCGGGAAGCGAATGGA   | F:DNMT1          |
| R:CTGGAGACAGGTTTGGGGGG    | R:IDNMT1         |

**Table S3: IRS1 siRNA sequence**

|            | sense (5'-3')        | antisense (5'-3')    |
|------------|----------------------|----------------------|
| IRS1-siRNA | GGAAAUUAUCCUGGACAATT | UUGUCCAGGAUUAUUUCCTT |

**Table S4: Primers for dual luciferase reporter gene**

| *Primer sequences(5'--3')                    | *The primer name |
|----------------------------------------------|------------------|
| ccgctcgagTTGCGTTGGGTGGAGAGAGT                | IRS1-up          |
| ATTGGCAATTGAATGGAAGCAcgcccgcgataaa           | IRS1-Down        |
| GTAATATAATAAGAATCATATTTTTTTTGGATTGTTCTCAATTG | IRS1-overlap     |
